# Supplementary material
Source: publisher figshare collection journal article supplement (https://acs.figshare.com/ndownloader/files/25515781)
Supplement: Supplementary file 1 [file 25515781]

# Co-assembly of C<sub>13</sub>-dipeptides: gelations from solutions and precipitations

Tan Hu<sup>†,‡1</sup>, Zhuo Zhang<sup>†,‡1</sup>, Stephen Robert Euston<sup>§</sup>, Mengjie Geng<sup>†,‡</sup> and Siyi Pan<sup>\*†,‡</sup>

<sup>†</sup>College of Food Science and Technology, Huazhong Agricultural University, No. 1 Shizishan Road, Wuhan, Hubei 430070, PR China

<sup>‡</sup>Key Laboratory of Environment Correlative Dietology, Huazhong Agricultural University, Ministry of Education, Wuhan, Hubei 430070, PR China

<sup>§</sup>Institute of Mechanical, Process & Energy Engineering School of Engineering & Physical Sciences, Heriot-Watt University, Edinburgh, EH14 4AS, United Kingdom

<sup>1</sup> Tan Hu and Zhuo Zhang contributed equally.

## HPLC analysis and Mass analysis of C<sub>13</sub>-dipeptides

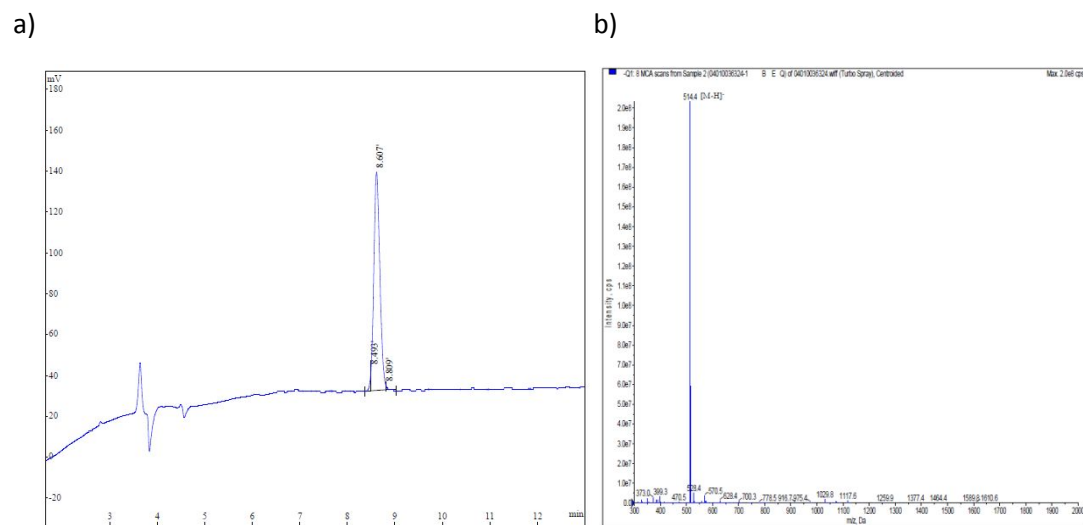

**Figure S1** HPLC (a) and mass spectroscopy (b) of synthesized C<sub>13</sub>-WD.

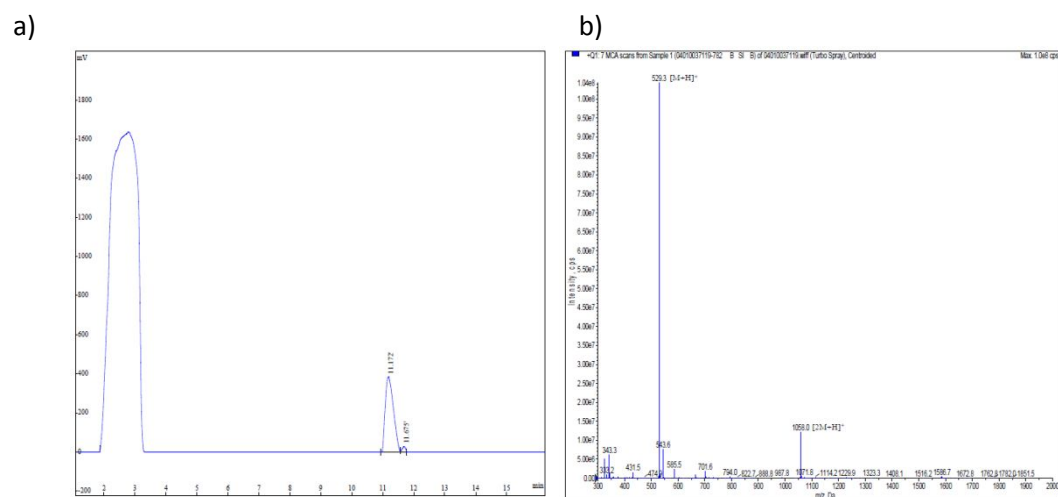

**Figure S2** HPLC (a) and mass spectroscopy (b) of synthesized C<sub>13</sub>-KW.

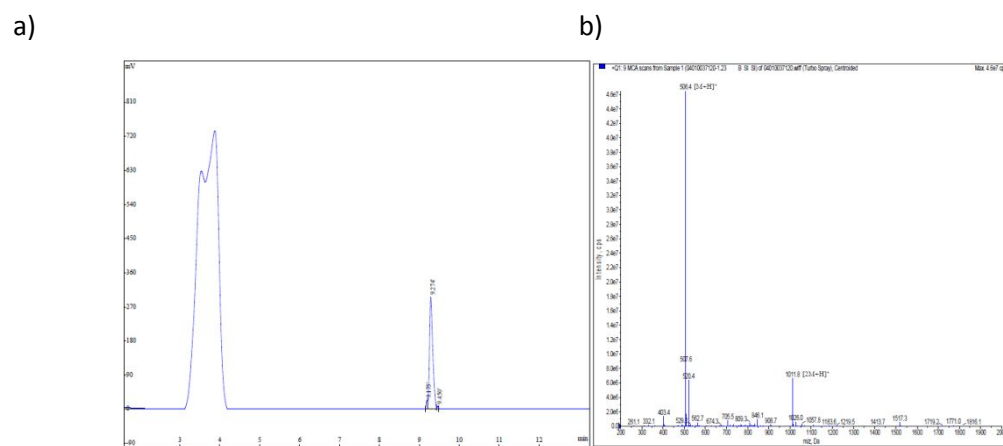

**Figure S3.** HPLC (a) and mass spectroscopy (b) of synthesized C<sub>13</sub>-YK.

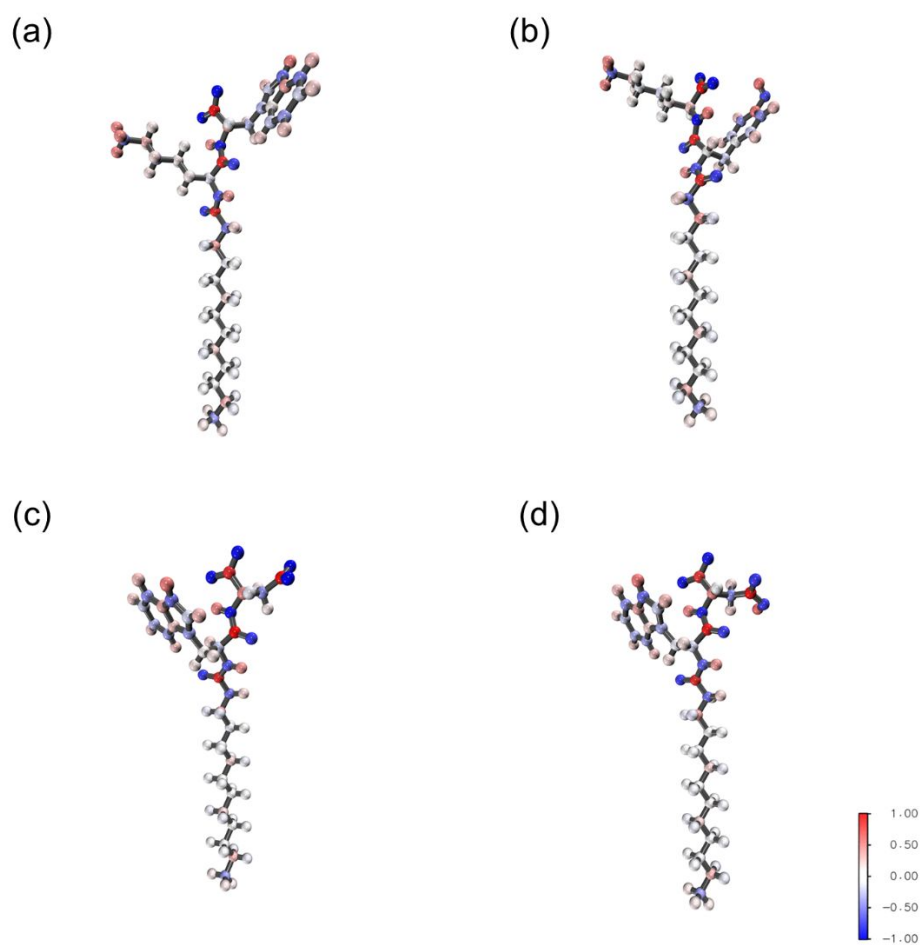

**Figure S4.** The atomic charges at pH=4.6 of (a) C<sub>13</sub>-KW, (b) C<sub>13</sub>-YK, (c) C<sub>13</sub>-WD<sup>2-</sup>, and (d) C<sub>13</sub>-WD<sup>-</sup>.

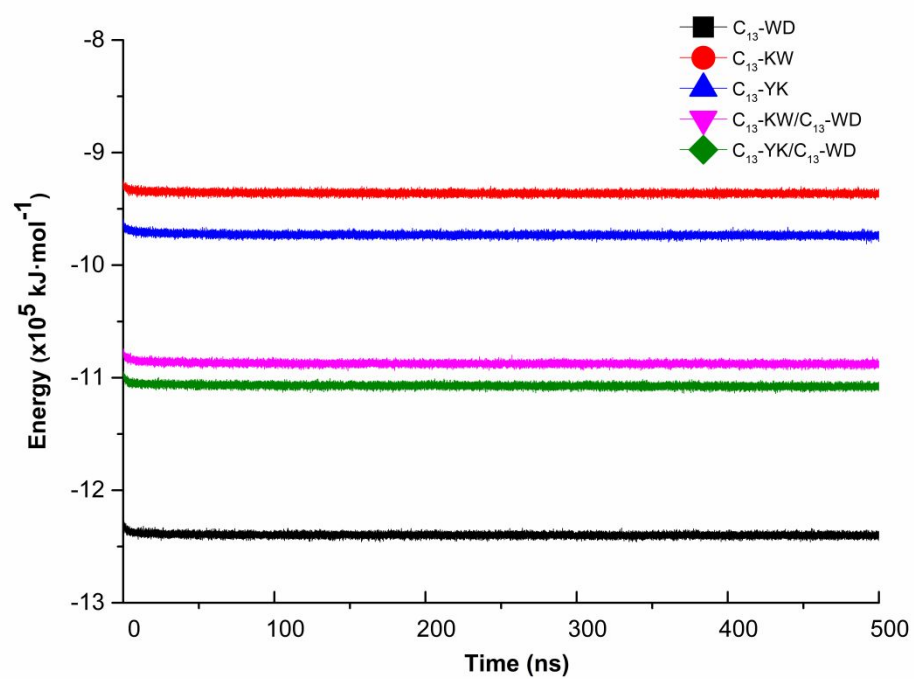

**Figure S5.** The total energies of the individual systems for the 500 ns trajectories.

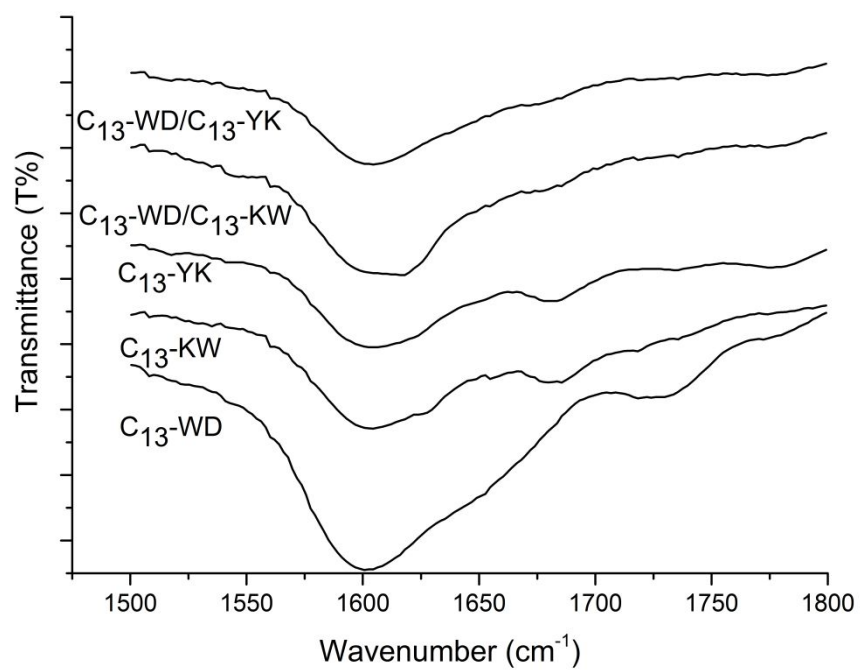

**Figure S6.** The details of FT-IR in 1500cm<sup>-1</sup>~1800cm<sup>-1</sup> of C<sub>13</sub>-WD, C<sub>13</sub>-KW, C<sub>13</sub>-YK, C<sub>13</sub>-WD/C<sub>13</sub>-KW and C<sub>13</sub>-WD/C<sub>13</sub>-YK.

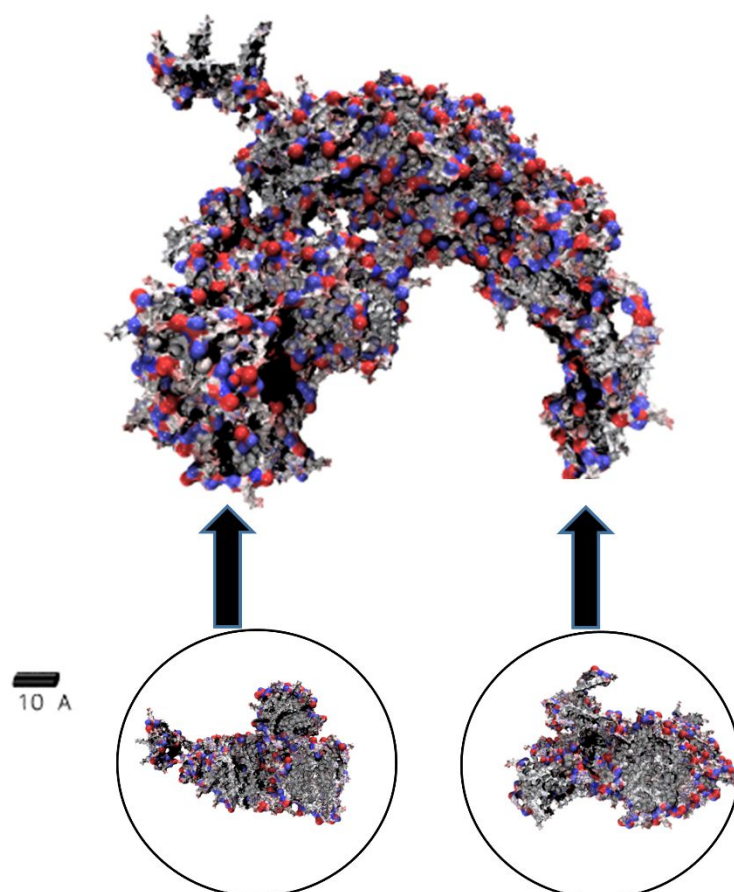

**Figure S7.** The charge distribution of C<sub>13</sub>-KW at pH=4.6.

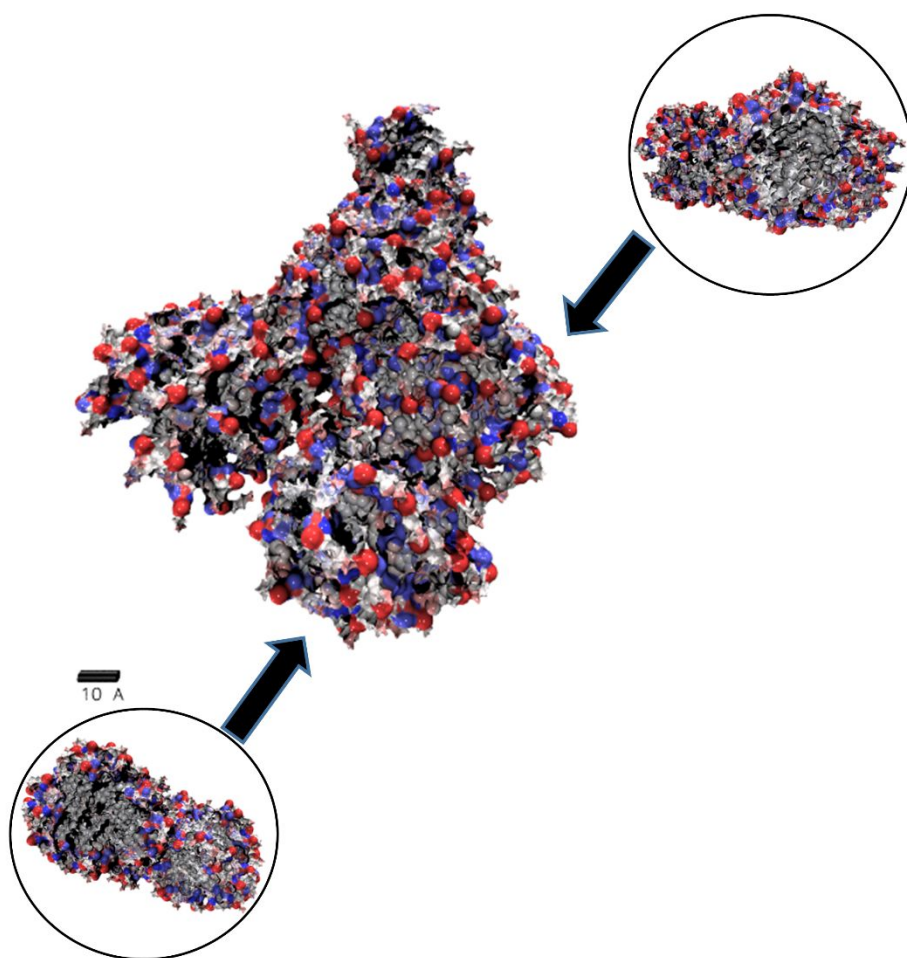

**Figure S8.** The charge distribution of C<sub>13</sub>-YK at pH=4.6.

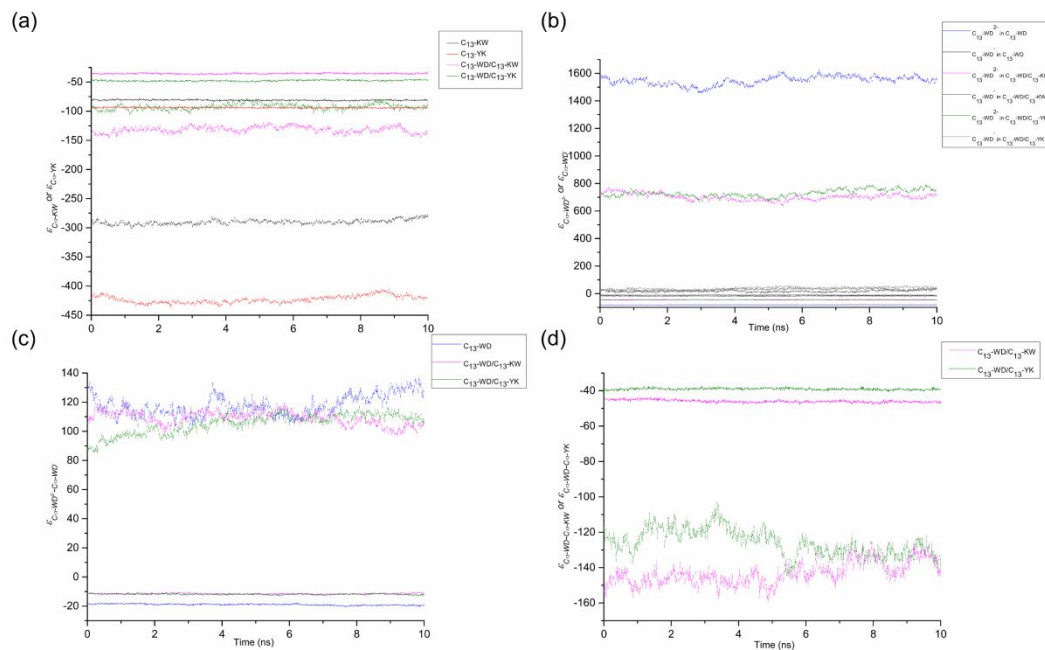

**Figure S9.** Molecular contributions to the hydrophobic (as revealed by Lennard-Jones potentials, solid lines) and electrostatic (as revealed by Coulomb potentials, dashed lines) interactions,  $\epsilon$ , for various molecules and systems.



**Table S1.** Lennard-Jones potentials and the Coulomb potentials averaged from the last 100 ns of the trajectories for a single C<sub>13</sub>-dipeptide molecule.

| Name                             | C <sub>13</sub> -KW | C <sub>13</sub> -YK | C <sub>13</sub> -WD <sup>2-</sup> | C <sub>13</sub> -WD <sup>-</sup> |
|----------------------------------|---------------------|---------------------|-----------------------------------|----------------------------------|
| Lennard-Jones potential (kJ/mol) | -54.82±5.09         | -32.11±4.54         | -34.26±6.06                       | -35.98±5.98                      |
| Coulomb potential (kJ/mol)       | -799.75±25.48       | -951.29±25.91       | -521.54±21.16                     | -640.55±48.33                    |
